# Supplementary material for: Identification of skin-related lncRNAs as potential biomarkers that are involved in Wnt pathways in keloids
Source: PubMed Central journal article supplement (PMC5470963; doi:10.18632/oncotarget.15880), 2017-03-03
Supplement: oncotarget-08-34236-s001.pdf [file oncotarget-08-34236-s001.pdf]

# Identification of skin-related lncRNAs as potential biomarkers that are involved in Wnt pathways in keloids

## Supplementary Materials

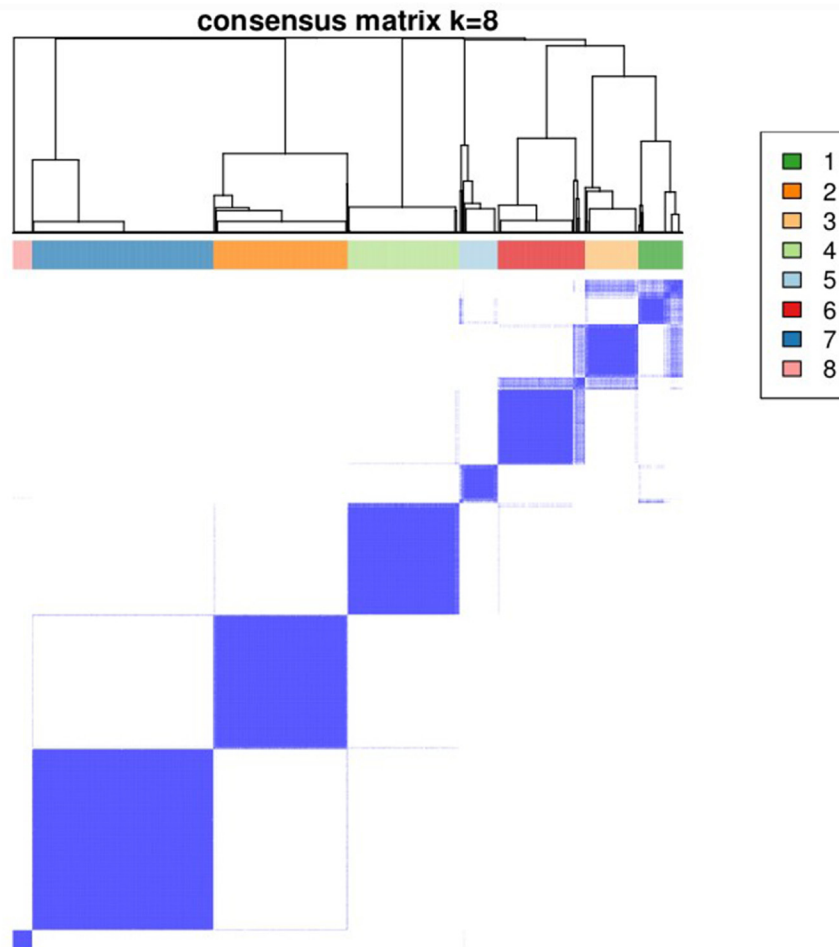

Supplementary Figure 1: Original image produced by R Soft on how genes involving in Wnt pathway clustered in keloid.

**Supplementary Table 1: List of clustered functions in each module of the network in Wnt pathway in keloid.** See [Supplementary\\_Table\\_1](#)

**Supplementary Table 2: List of Wnt-genes clustered in each functional module of the network in Wnt pathway in keloid.** See [Supplementary\\_Table\\_2](#)

**Supplementary Table 3: The interactive profile of lncRNAs to 17 skin-related Wnt-genes ranking by Pearson correlation coefficient.** See [Supplementary\\_Table\\_3](#)

**Supplementary Table 4: Primers of validated skin-related lncRNA-gene pairs that involved in Wnt pathway in keloids**

| Molecules                                                                                       | Sequence of Forward (F) and Reverse (R) Primer                  | Annealing Temperature (°C) | Primer length (bp) |
|-------------------------------------------------------------------------------------------------|-----------------------------------------------------------------|----------------------------|--------------------|
| 12 skin-related Wnt genes/mRNAs/transcripts due to reverse network selection                    |                                                                 |                            |                    |
| MMP2                                                                                            | F:5' GCCCAAGAATAGATGCTGACTG3'<br>R:5' GAAAGGAGAAGAGCCTGAAGTG3'  | 60                         | 256                |
| CDKN2A                                                                                          | F:5' CATTTCATGTGGGCATTTCTTG3'<br>R:5' CTTTGGTTCTGCCATTTGCTA3'   | 60                         | 140                |
| KRT5                                                                                            | F:GATGAAATCAACAAGCGTACCA<br>R:ACCTCAGCGATGATGCTATCC             | 60                         | 248                |
| KRT14                                                                                           | F:5' GAACAAGATTCTCACAGCCACAG3'<br>R:5' TCTCCACATTGACATCTCCACC3' | 60                         | 296                |
| TCF4                                                                                            | F:5'CAGCCATTCTCTTCTGCCAAA3'<br>R :5' CAGGTTCTCATCACCCCTCGTC3'   | 60                         | 181                |
| ANTXR1                                                                                          | F:5'CTGCCAGGAGGAGACACTTAC3'<br>R :5' TTTTCATAATAAATCTGCTCACTG3' | 60                         | 68                 |
| GJB6                                                                                            | F:5'GGGTGACGAGCAAGAGGACTT3'<br>R :5' TGCGAGTGGTTTTCGTGCC3'      | 60                         | 182                |
| SIX1                                                                                            | F:5'TGCCTAAATGTCTTAATGCTC3'<br>R :5' CAGGTTGCCAGATTCGTT3'       | 60                         | 287                |
| AKT1                                                                                            | F:5'CACACCACCTGACCAAGATG3'<br>R :5' GCACCCGAGAAATAAAAACC3'      | 60                         | 191                |
| TGFB1                                                                                           | F:5'CCGACTACTACGCCAAGGA3'<br>R :5' CTGAGGTATCGCCAGGAAT3'        | 60                         | 247                |
| KRAS                                                                                            | F:5'ATTAGTGTCATCTTGCCTCCCT3'<br>R :5' CAGCAGCAGTAAATCTTATGGTT3' | 60                         | 97                 |
| TWIST1                                                                                          | F:5'GACAGTGATTCCCAGACGG3'<br>R :5' GTCCATAGTGATGCCTTTCCT3'      | 60                         | 190                |
| 7 most co-expressed lncRNAs characterized with array-detected significant alteration in keloids |                                                                 |                            |                    |
| CACNA1G-AS1                                                                                     | F:5' CTGGCAAGGTTGAGTAGGCT3'<br>R:5' TGCTCCCTTCACACGGTCA3'       | 60                         | 173                |
| HOXA11-AS                                                                                       | F:5' TAAACCGCCAACAGCCAGAA3'<br>R:5' GGGAAAGATGAGGGGAGAGG3'      | 60                         | 107                |
| LINC00312                                                                                       | F:5' GGTCAGTCCTATGCTTATCCCTT3'<br>R:5' ATGCTTTGCTCCTGTTGCTCT3'  | 60                         | 194                |
| RP4-794H19.4                                                                                    | F:5'TCTAAGGACCACTCTATTACCCC3'<br>R :5'GATGTAGCCAGCAGGAAAGCC3'   | 60                         | 117                |
| AP001476.4                                                                                      | F:5'AGCAGCCGCACTAAGACACT3'<br>R :5'GTGTTTGAACGCGAGAGGGT3'       | 60                         | 88                 |
| RP11-91I11.1                                                                                    | F:5'AAGCAAAATCGTCCTGTTCCC3'<br>R :5'CCCAGCTTAGTTCTTCTCCAATG3'   | 60                         | 98                 |
| AC004074.3                                                                                      | F:5'GCGGGACCCTTTTTATTGC3'<br>R :5'CCTGTTCTTGAAGTTGGGGTTC3'      | 60                         | 74                 |
| Internal molecular reference                                                                    |                                                                 |                            |                    |
| β-actin                                                                                         | F:5' GTGGCCGAGGACTTTGATTG3'<br>R:5' CCTGTAAACAACGCATCTCATATT3'  | 60                         | 73                 |

**Supplementary Excel 1: LncRNA expression profiling data.** See [Supplementary\\_Excel\\_1](#)

**Supplementary Excel 2: coding RNA expression profiling data.** See [Supplementary\\_Excel\\_2](#)

**Supplementary Excel 3: Differentiated LncRNA expression profiling data.** See [Supplementary\\_Excel\\_3](#)

**Supplementary Excel 4: Differentiated coding RNA expression profiling data.** See [Supplementary\\_Excel\\_4](#)
